# Supplementary material for: Molybdenum disulfide (MoS2) nanoflakes as inherently electroactive labels for DNA hybridization detection
Source: Royal Society of Chemistry journal article supplement (doi:10.1039/c4nr03795b), 2014-01-01
Supplement: c4nr03795b1.pdf [file c4nr03795b1.pdf]

# *Supporting Information*

## **Molybdenum Disulfide (MoS<sub>2</sub>) Nanoflakes as Inherently Electroactive Labels for DNA Hybridization Detection**

Adeline Huiling Loo, Alessandra Bonanni,\* Adriano Ambrosi and Martin  
Pumera\*

Division of Chemistry & Biological Chemistry, School of Physical and Mathematical Sciences,  
Nanyang Technological University  
21 Nanyang Link, Singapore 637371, Singapore.

Fax: (65) 6791-1961

Email: a.bonanni@ntu.edu.sg; pumera@ntu.edu.sg

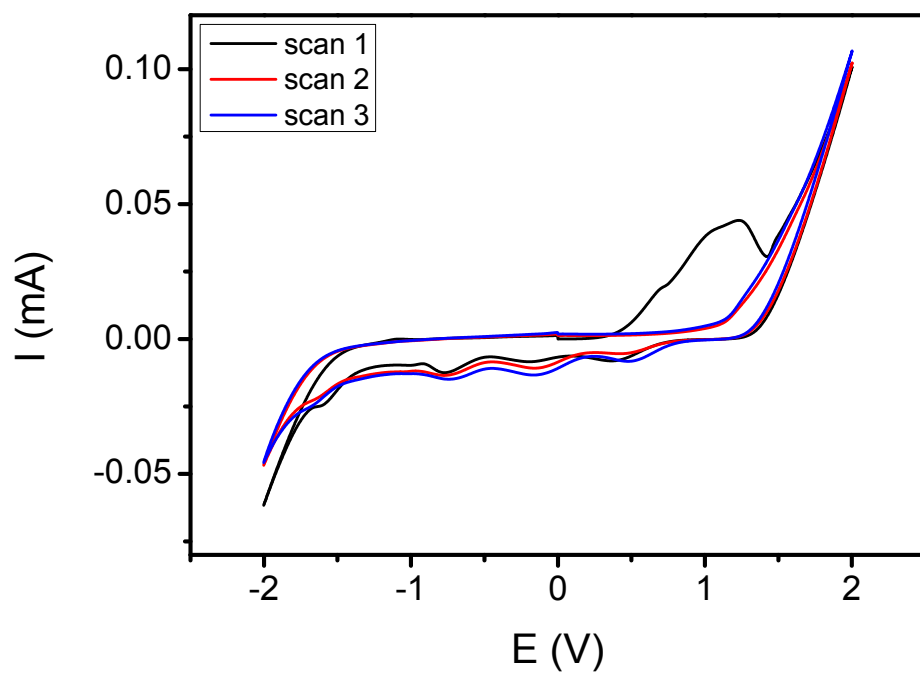

**Figure S1.** Inherent electrochemical behavior of MoS<sub>2</sub> nanoflakes. Cyclic voltammogram depicting the electrochemical behavior of MoS<sub>2</sub> nanoflakes in 0.1 M PBS buffer solution (pH 7.0) and scan rate of 0.1 V/s under ambient conditions.
